# Supplementary material for: Tyrosol and its metabolites as antioxidative and anti-inflammatory molecules in human endothelial cells
Source: Royal Society of Chemistry journal article supplement (doi:10.1039/c7fo00641a), 2017-01-01
Supplement: c7fo00641a2.pdf [file c7fo00641a2.pdf]

## Electronic Supplementary Information (ESI)

### **Tyrosol and its metabolites as antioxidative and anti-inflammatory molecules in human endothelial cells**

Francisco J.G. Muriana,<sup>\*a</sup> Sergio Montserrat-de la Paz,<sup>a</sup> Ricardo Lucas,<sup>b</sup> Beatriz Bermudez,<sup>c</sup>  
Sara Jaramillo,<sup>d</sup> Juan C. Morales,<sup>b</sup> Rocio Abia<sup>a</sup> and Sergio Lopez<sup>\*a</sup>

<sup>a</sup>Laboratory of Cellular and Molecular Nutrition, Instituto de la Grasa (CSIC). Seville, Spain.

<sup>b</sup>Department of Bioorganic Chemistry, Instituto de Investigaciones Químicas (CSIC-  
Universidad de Sevilla). Seville, Spain. <sup>c</sup>Department of Cell Biology, School of Biology  
(University of Seville). 41012 Seville, Spain. <sup>d</sup>Phytochemicals and Food Quality Group,  
Instituto de la Grasa (CSIC). Seville, Spain.

## 14 ESI Materials and Methods

### 15 Synthesis of Tyr-GLU metabolite

16 To a solution of Tyr acetate **4** [1] (200 mg, 1.02 mmol) in anhydrous CH<sub>2</sub>Cl<sub>2</sub> (6 mL) and  
17 trichloroacetimidate acetylate glucuronosyl donor **5** [2] (366 mg, 0.76 mmol) at –10 °C,  
18 BF<sub>3</sub>·OEt<sub>2</sub> (25 µL, 0.19 mmol) was added drop wise. After 2 h, TLC (hexane-EtOAc 2:1) showed  
19 the formation of a new product and complete consumption of the glycosyl donor. The  
20 reaction was neutralized with NEt<sub>3</sub> and concentrated in vacuum. The resulting residue was  
21 purified by flash column chromatography (hexane-EtOAc from 3:1 to 1:1) to afford 2-[4'-  
22 (methyl 2,3,4-tri-*O*-acetyl-β-D-glucopyranosyluronate)phenyl] EtOAc, a solution of which (60  
23 mg, 0.11 mmol) in MeOH (2 mL) was stirred at room temperature with a solution of Na<sub>2</sub>CO<sub>3</sub>  
24 (22 mg, 0.204 mmol) in H<sub>2</sub>O (0.5 mL). After 16 h, water (1 mL) was added, followed by  
25 addition of glacial acetic acid to adjust the pH to 6.2. The solvents were then removed and  
26 residue was purified by Sephadex G-25 eluting with H<sub>2</sub>O-MeOH (9:1). Fractions containing  
27 the desired product were freeze-dried affording compound **2**, tyrosol 4'-*O*-β-D-glucuronide  
28 (Tyr-GLU) (25 mg, 98%); <sup>1</sup>H NMR (500.13 MHz, CD<sub>3</sub>OD) δ: 7.13 (d, *J* = 8.36 Hz, H-2', H6'), 7.04  
29 (d, *J* = 8.43 Hz, H-3', H-5'), 4.87 (d, *J* = 7.10 Hz, H-1''), 3.76 (bs, H-5''), 3.70 (t, *J* = 7.12 Hz, H-1),  
30 3.57-3.45 (m, H-2'', H-3'', H-4''), 2.76 (t, *J* = 7.12 Hz, H-2); <sup>13</sup>C NMR (100.62 MHz, CD<sub>3</sub>OD) δ:  
31 176.6 (C-6''), 157.8 (C-4'), 134.3 (C-1'), 130.9 (C-2', C-6'), 118.0 (C-3', C-5'), 102.7 (C-1''), 77.8  
32 (C-3''), 76.7 (C-5''), 74.8 (C-2''), 73.7 (C-4''), 64.4 (C-1), 39.5 (C-2). ESI-HRMS: Calcd for  
33 C<sub>14</sub>H<sub>18</sub>O<sub>8</sub> (M<sup>-</sup>): 314.29. Found: 312.9.

34

### 35 Synthesis of Tyr-SUL metabolite

36 *Candida antarctica* lipase (Novozym 435®) (180 mg) was added to a mixture of Tyr (1 equiv)  
37 and the acylating agent methyl butyrate (20 equiv) in 45 mL of *t*-butyl methyl ether using a

dry round-bottom flask, and the mixture was stirred for 60 min at 40 °C. The enzyme was decanted and separated. The solvent was evaporated, and the product Tyr butyrate **6** was purified by flash column chromatography [1, 3]. Tyr butyrate **6** (70 mg, 0.33 mmol) and  $\text{SO}_3\cdot\text{NMe}_3$  (233 mg, 1.7 mmol) were subjected to sulphation conditions for 20 min. Microwave based sulphation reaction was performed using a microwave synthesizer in sealed reaction vessels [4]. TLC (ethyl acetate:MeOH; 10:1) showed the formation of a major product and complete consumption of the starting material. Solvents were removed and the crude extract was purified by using Sephadex LH-20 in a solvent mixture of  $\text{CH}_2\text{Cl}_2$ :MeOH (1:1) to afford triethylammonium, 4-(2-(butyryloxy)ethyl)phenyl sulphate salt, a solution of which (97 mg, 0.32 mmol) and potassium carbonate ( $\text{K}_2\text{CO}_3$ , 90 mg, 0.66 mmol) were prepared in MeOH (10 mL). The reaction mixture was stirred at room temperature for 24 h, neutralized with IR 120  $\text{H}^+$  resin, and the solvent was then removed in a vacuum. The crude extract was purified by column chromatography with RP-C18 silica gel eluting with  $\text{H}_2\text{O}$ :MeOH (from 100:0 to 70:30). Fractions containing the desired product were concentrated and freeze-dried affording compound **3**, tyrosol 4-sulfate (Tyr-SUL) (68 mg, 94%, white powder).  $^1\text{H}$ -NMR (400 MHz,  $\text{D}_2\text{O}$ )  $\delta$ : 7.18, 6.86 (2d, 4H,  $J = 8.4$  Hz,  $\text{H}_{\text{arom}}$ ), 3.78, 2.78 (2t, 4H,  $J = 6.7$  Hz,  $\text{CH}_2\text{OH}$ ,  $\text{CH}_2\text{Ar}$ );  $^{13}\text{C}$ -NMR (75 MHz,  $\text{D}_2\text{O}$ )  $\delta$ : 157 (Cq), 130.3 ( $2 \times \text{CH}_{\text{arom}}$ ), 129.8 (Cq), 117.1 ( $2 \times \text{CH}_{\text{arom}}$ ), 63.0 ( $\text{CH}_2\text{OH}$ ), 36.9 ( $\text{CH}_2\text{Ar}$ ). ESI-HRMS ( $\text{ES}^-$ ) Calcd for  $\text{C}_8\text{H}_9\text{O}_5\text{S}$  (M – H) 217.0171, Found: 217.0171.

57

#### 58 SUPPLEMENTARY REFERENCES

59 1. S. Grasso, L. Siracusa, C. Spatafora, M. Renis and C. Tringali, Hydroxytyrosol lipophilic  
60 analogues: enzymatic synthesis, radical scavenging activity and DNA oxidative damage  
61 protection, *Bioorg Chem*, 2007, **35**, 137-52.

- 62 2. B. Fischer, A. Nudelman, M. Ruse, J. Herzig, H.E. Gottlieb and E. Keinan, A novel  
63 method for stereoselective glucuronidation, *J Org Chem*, 1984, **49**, 4988-93.
- 64 3. R. Lucas, F. Comelles, D. Alcantara, O. S. Maldonado, M. Curcuroze, J. L. Parra, and J.  
65 C. Morales, Surface-active properties of lipophilic antioxidants tyrosol and hydroxytyrosol  
66 fatty acid esters: a potential explanation for the nonlinear hypothesis of the antioxidant  
67 activity in oil-in-water emulsions, *J Agric Food Chem*, 2010, **58**, 8021-6.
- 68 4. A. Atzeri, R. Lucas, A. Incani, P. Penalver, A. Zafra-Gomez, M. P. Melis, R. Pizzala, J. C.  
69 Morales and M.Deiana, Hydroxytyrosol and tyrosol sulfate metabolites protect against the  
70 oxidized cholesterol pro-oxidant effect in Caco-2 human enterocyte-like cells, *Food Funct*,  
71 2016, **7**, 337-46.

72 **ESI Table 1.** Sequences of primers for gene expression analysis.

| Target     | GenBank accession number | Direction | Sequence (5'→3')      |
|------------|--------------------------|-----------|-----------------------|
| GPX1       | NM_000581                | Forward   | AGAATGTGGCGTCCCTCTGA  |
|            |                          | Reverse   | ACCGTTCACCTCGCACTTCT  |
| GCLC       | NM_001498                | Forward   | TCCAGGTGACATTCCAAGCC  |
|            |                          | Reverse   | GAAATCACTCCCCAGCGACA  |
| HO-1       | NM_002133                | Forward   | TCTTGGCTGGCTTCCTTACC  |
|            |                          | Reverse   | GGATGTGCTTTTCGTTGGGG  |
| E-selectin | NM_000450                | Forward   | AGCCCAGAGCCTTCAGTGTA  |
|            |                          | Reverse   | AACTGGGATTTGCTGTGTCC  |
| ICAM-1     | NM_000201                | Forward   | CAGTCACCTATGGCAACGAC  |
|            |                          | Reverse   | ATTCAGCGTCACCTTGGCTC  |
| VCAM-1     | NM_001078                | Forward   | TCCGTCTCATTGACTTGACAG |
|            |                          | Reverse   | CACCTGCATTCCTTTTCCA   |
| CCL2       | NM_002982                | Forward   | CCCCAGTCACCTGCTGTTAT  |
|            |                          | Reverse   | TGGAATCCTGAACCCACTTC  |
| PTGS2      | NM_000963                | Forward   | TGAGCATCTACGGTTTGCTG  |
|            |                          | Reverse   | TGCTTGTCTGGAACAACCTGC |
| GAPDH      | NM_001289746             | Forward   | TCGACAATGGCAGCATCTAC  |
|            |                          | Reverse   | ATCCGTCTCCACAGACAAGG  |
| HPRT       | NM_000194                | Forward   | ACCCACGAAGTGTTGGATA   |
|            |                          | Reverse   | AAGCAGATGGCCACAGAACT  |

**ESI Table 2.** Effects of Tyr, Tyr-GLU, and Tyr-SUL on hEC viability.

| Concentration ( $\mu$ M) | Tyr                        | Tyr-GLU                    | Tyr-SUL                     |
|--------------------------|----------------------------|----------------------------|-----------------------------|
| 0                        | 100 $\pm$ 3.1 <sup>a</sup> | 100 $\pm$ 4.4 <sup>a</sup> | 100 $\pm$ 10.7 <sup>a</sup> |
| 1                        | 101 $\pm$ 2.7 <sup>a</sup> | 97 $\pm$ 5.6 <sup>a</sup>  | 97 $\pm$ 4 <sup>a</sup>     |
| 5                        | 99 $\pm$ 4.8 <sup>a</sup>  | 95 $\pm$ 6.2 <sup>a</sup>  | 96 $\pm$ 4.8 <sup>a</sup>   |
| 10                       | 96 $\pm$ 4 <sup>a</sup>    | 95 $\pm$ 3.8 <sup>a</sup>  | 95 $\pm$ 6.5 <sup>a</sup>   |
| 15                       | 98 $\pm$ 2.9 <sup>a</sup>  | 96 $\pm$ 7.8 <sup>a</sup>  | 97 $\pm$ 4.7 <sup>a</sup>   |
| 50                       | 97 $\pm$ 2.5 <sup>a</sup>  | 96 $\pm$ 2.4 <sup>a</sup>  | 95 $\pm$ 2.9 <sup>a</sup>   |
| 100                      | 96 $\pm$ 6 <sup>a</sup>    | 95 $\pm$ 9 <sup>a</sup>    | 95 $\pm$ 5 <sup>a</sup>     |
| 200                      | 93 $\pm$ 4.3 <sup>a</sup>  | 71 $\pm$ 2.3 <sup>b</sup>  | 58 $\pm$ 11 <sup>b</sup>    |

hECs were cultured in the presence of Tyr or Tyr metabolites (0-200  $\mu$ M) for 48 h. Values are expressed in % of cells alive and are shown as mean  $\pm$  SD of eight samples repeated in three separate experiments. Means within columns sharing the same letter are not significantly different from each other ( $p < 0.05$ ).

**ESI Table 3.** Concentration of soluble forms of E-selectin, ICAM-1, and VCAM-1 in the medium of hECs.

| Treatment               | sE-selectin            | sICAM-1                | sVCAM-1                 |
|-------------------------|------------------------|------------------------|-------------------------|
| Control                 | 2.9 ± 1.5 <sup>a</sup> | 3.0 ± 0.7 <sup>a</sup> | 3.2 ± 1.7 <sup>a</sup>  |
| TNF- $\alpha$           | 7.9 ± 1.0 <sup>b</sup> | 7.4 ± 1.3 <sup>b</sup> | 19.6 ± 3.0 <sup>b</sup> |
| Tyr + TNF- $\alpha$     | 3.4 ± 1.8 <sup>a</sup> | 5.9 ± 1.9 <sup>a</sup> | 15.7 ± 5 <sup>b</sup>   |
| Tyr-GLU + TNF- $\alpha$ | 2.6 ± 2.5 <sup>a</sup> | 3.1 ± 1.2 <sup>a</sup> | 2.6 ± 2.5 <sup>a</sup>  |
| Tyr-SUL + TNF- $\alpha$ | 3.5 ± 2.8 <sup>a</sup> | 2.9 ± 0.7 <sup>a</sup> | 4.1 ± 2.8 <sup>a</sup>  |

hECs were untreated (control) or exposed to Tyr or its metabolites (100  $\mu$ M) for 16 h and then with TNF- $\alpha$  (10 ng/mL) for additional 16 h. Values are expressed in pg/mL and are shown as mean  $\pm$  SD of three independent experiments. Means within columns sharing the same letter are not significantly different from each other ( $p < 0.05$ ).
